# Supplementary material
Source: PubMed Central journal article supplement (PMC5210057)
Supplement: PulmCirc-006-498.s001.pdf [file PulmCirc-006-498.s001.pdf]

## Appendix from DuBrock et al., “Macrophage migration inhibitory factor as a novel biomarker of portopulmonary hypertension” (Pulm. Circ., vol. 6, no. 4, p. 498)

Table S1. Raw data of pixel density for cytokines included in Proteome Profiler Human XL Cytokine antibody array kit (R&D Systems, Minneapolis, MN) performed at R&D Systems in duplicate for controls ( $n = 3$ ) and patients with portopulmonary hypertension (POPH;  $n = 3$ )

| Biomarker               | Control   |           |           | POPH      |           |           |
|-------------------------|-----------|-----------|-----------|-----------|-----------|-----------|
|                         | 1         | 2         | 3         | 1         | 2         | 3         |
| Adiponectin (a)         | 49,475.05 | 51,813.08 | 53,522.44 | 55,451.35 | 57,121.03 | 51,293.78 |
| Adiponectin (b)         | 48,409.73 | 49,735.91 | 53,539.46 | 53,638.29 | 56,941.99 | 53,726.59 |
| Aggrecan (a)            | 42,337.03 | 33,407    | 39,124.06 | 37,635.05 | 43,924.06 | 43,649.43 |
| Aggrecan (b)            | 43,803.35 | 34,796.37 | 39,260.97 | 37,627.76 | 44,340.47 | 44,042.34 |
| Angiogenin (a)          | 48,575.81 | 47,943.91 | 51,092.87 | 50,782.59 | 53,224.32 | 54,202.95 |
| Angiogenin (b)          | 47,950.39 | 49,051.35 | 48,820.47 | 49,131.56 | 50,935.71 | 53,827.05 |
| Angiopoietin-1 (a)      | 4,577.84  | 7,119.2   | 4,712.32  | 5,570.24  | 6,515.66  | 5,567.81  |
| Angiopoietin-1 (b)      | 4,270.8   | 6,897.23  | 4,054.49  | 5,721.73  | 5,888.62  | 5,311.81  |
| Angiopoietin-2 (a)      | 7,388.97  | 4,646.7   | 5,370.14  | 6,734.39  | 6,149.48  | 11,491.46 |
| Angiopoietin-2 (b)      | 6,974.19  | 4,525.99  | 5,071.2   | 6,541.58  | 5,816.52  | 10,307.86 |
| BAFF (a)                | 36,824.92 | 12,810.34 | 14,595.86 | 31,761.63 | 12,899.46 | 29,878.09 |
| BAFF (b)                | 35,090.44 | 12,770.65 | 14,148.67 | 30,428.97 | 12,428.77 | 27,502.8  |
| BDNF (a)                | 4,868.67  | 4,154.14  | 4,848.42  | 5,141.68  | 5,105.23  | 6,755.46  |
| BDNF (b)                | 4,503.3   | 4,230.29  | 4,483.05  | 4,983.71  | 4,812.77  | 6,235.35  |
| C-reactive protein (a)  | 54,720.62 | 57,038.39 | 55,866.95 | 47,585.03 | 61,840.01 | 56,670.59 |
| C-reactive protein (b)  | 52,023.71 | 56,764.57 | 56,988.16 | 41,436.97 | 63,026.04 | 56,401.63 |
| C5/C5a (a)              | 26,880.62 | 26,495.81 | 28,324.27 | 22,486.49 | 34,547.66 | 28,819.25 |
| C5/C5a (b)              | 27,324.57 | 26,209.84 | 28,707.46 | 22,821.89 | 34,077.78 | 29,083.35 |
| CD14 (a)                | 21,054.19 | 14,609.63 | 18,332.97 | 18,935.71 | 26,904.11 | 25,932.77 |
| CD14 (b)                | 19,336.72 | 15,288.52 | 19,893.28 | 19,371.56 | 26,252.77 | 27,424.22 |
| CD30 (a)                | 4,303.2   | 4,010.75  | 6,633.13  | 4,270.8   | 4,289.43  | 4,581.08  |
| CD30 (b)                | 4,634.54  | 4,183.3   | 7,536.42  | 4,628.06  | 4,748.77  | 4,483.86  |
| CD40 ligand (a)         | 6,127.61  | 4,913.23  | 7,488.62  | 7,002.54  | 7,017.13  | 7,020.37  |
| CD40 ligand (b)         | 7,797.28  | 5,099.56  | 7,313.63  | 7,405.18  | 7,789.99  | 7,788.37  |
| Chitinase 3-like 1 (a)  | 57,829.89 | 59,574.9  | 59,099.35 | 56,523.96 | 60,417.43 | 57,890.65 |
| Chitinase 3-like 1 (b)  | 58,441.53 | 59,017.53 | 56,608.22 | 55,395.46 | 58,857.13 | 58,610.04 |
| Complement factor D (a) | 45,576.72 | 45,046.09 | 46,562.65 | 45,570.24 | 49,713.23 | 48,519.91 |
| Complement factor D (b) | 43,177.94 | 43,029.68 | 45,726.59 | 44,027.76 | 48,474.54 | 48,539.35 |
| Cripto-1 (a)            | 4,456.32  | 4,342.9   | 5,769.53  | 5,609.13  | 5,932.37  | 4,816.01  |
| Cripto-1 (b)            | 4,308.87  | 4,070.7   | 5,148.16  | 5,344.22  | 5,042.04  | 4,285.38  |
| Cystatin C (a)          | 42,534.7  | 38,213.48 | 40,565.28 | 37,703.1  | 41,587.66 | 47,457.03 |
| Cystatin C (b)          | 42,581.68 | 39,012.27 | 40,379.76 | 37,946.95 | 42,130.44 | 46,264.52 |
| Dkk-1 (a)               | 4,610.24  | 4,376.92  | 4,345.33  | 4,321.84  | 4,434.44  | 4,572.16  |

Table S1 (Continued)

|                    |           |           |           |           |           |           |
|--------------------|-----------|-----------|-----------|-----------|-----------|-----------|
| Dkk-1 (b)          | 4,322.65  | 4,222.19  | 4,004.27  | 4,322.65  | 4,123.35  | 4,406.9   |
| DPPIV (a)          | 19,430.7  | 14,381.18 | 24,554.75 | 11,702.9  | 35,501.18 | 38,807.3  |
| DPPIV (b)          | 19,316.47 | 14,224.82 | 23,883.96 | 11,749.89 | 35,797.68 | 39,267.46 |
| EGF (a)            | 5,270.49  | 4,368.82  | 4,946.44  | 5,410.65  | 6,691.46  | 5,624.52  |
| EGF (b)            | 4,930.24  | 4,103.1   | 4,515.46  | 5,453.58  | 6,423.3   | 5,690.14  |
| Emmprin (a)        | 25,514.75 | 17,168.01 | 24,142.39 | 21,741.18 | 29,767.91 | 32,976.01 |
| Emmprin (b)        | 26,339.46 | 17,531.76 | 24,390.29 | 21,983.41 | 31,657.13 | 32,724.06 |
| ENA-78/CXCL5 (a)   | 5,102.8   | 4,091.76  | 4,436.06  | 5,670.7   | 5,567     | 5,251.86  |
| ENA-78/CXCL5 (b)   | 5,165.18  | 4,103.1   | 4,530.04  | 6,239.41  | 5,370.14  | 5,690.14  |
| Endoglin (a)       | 42,504.72 | 39,474.04 | 40,132.67 | 40,569.33 | 45,897.53 | 44,485.48 |
| Endoglin (b)       | 44,210.85 | 40,539.35 | 40,144.82 | 41,313.84 | 44,061.78 | 45,533.78 |
| Fas ligand (a)     | 8,272.82  | 8,490.75  | 6,702.8   | 7,451.35  | 7,640.11  | 9,931.15  |
| Fas ligand (b)     | 6,987.15  | 7,363.86  | 5,654.49  | 6,684.97  | 6,038.49  | 7,862.9   |
| FGF basic (a)      | 7,225.33  | 6,184.32  | 5,836.77  | 10,375.1  | 7,203.46  | 7,942.29  |
| FGF basic (b)      | 8,634.95  | 7,249.63  | 8,084.87  | 10,597.89 | 8,258.24  | 9,260.37  |
| FGF-19 (a)         | 9,596.57  | 6,616.92  | 7,992.52  | 9,123.46  | 10,684.57 | 14,792.72 |
| FGF-19 (b)         | 9,436.97  | 6,801.63  | 8,316.57  | 9,861.48  | 10,581.68 | 17,103.2  |
| FGF-7 (a)          | 5,376.62  | 4,853.28  | 5,535.41  | 4,922.14  | 6,125.99  | 5,657.73  |
| FGF-7 (b)          | 4,381.78  | 3,890.04  | 4,160.62  | 4,368.01  | 4,909.18  | 4,123.35  |
| Flt-3 ligand (a)   | 5,109.28  | 3,975.1   | 6,268.57  | 6,198.09  | 5,014.49  | 9,035.96  |
| Flt-3 ligand (b)   | 4,754.44  | 4,058.54  | 5,848.11  | 5,780.06  | 5,106.85  | 8,103.51  |
| G-CSF (a)          | 3,949.99  | 3,894.09  | 3,909.48  | 4,120.11  | 4,139.56  | 4,252.97  |
| G-CSF (b)          | 3,949.18  | 3,941.89  | 3,938.65  | 4,036.67  | 4,004.27  | 4,570.54  |
| GDF-15 (a)         | 40,438.09 | 20,039.91 | 29,624.52 | 31,984.42 | 27,638.09 | 39,824.01 |
| GDF-15 (b)         | 40,287.41 | 20,970.75 | 29,311    | 34,463.41 | 27,331.05 | 40,420.27 |
| GM-CSF (a)         | 5,122.24  | 4,570.54  | 6,665.53  | 9,153.43  | 6,621.78  | 5,607.51  |
| GM-CSF (b)         | 5,494.9   | 4,820.06  | 6,822.7   | 9,681.63  | 6,907.76  | 5,792.22  |
| GRO alpha (a)      | 4,065.03  | 3,673.73  | 4,045.58  | 4,060.16  | 4,146.04  | 4,265.94  |
| GRO alpha (b)      | 3,981.58  | 3,882.75  | 4,074.75  | 4,783.61  | 4,103.91  | 4,368.82  |
| Growth hormone (a) | 23,878.29 | 3,857.63  | 5,267.25  | 39,828.06 | 4,882.44  | 28,370.44 |
| Growth hormone (b) | 23,081.94 | 3,859.25  | 4,863.81  | 39,254.49 | 4,692.87  | 28,107.15 |
| HGF (a)            | 7,046.29  | 4,243.25  | 4,288.62  | 6,411.15  | 5,659.35  | 11,729.63 |
| HGF (b)            | 7,796.47  | 4,201.13  | 4,855.71  | 7,336.32  | 6,422.49  | 12,474.95 |
| I-TAC (a)          | 4,071.51  | 3,897.33  | 4,021.28  | 4,889.73  | 4,073.94  | 5,148.97  |
| I-TAC (b)          | 4,522.75  | 4,417.43  | 4,267.56  | 5,093.08  | 3,928.92  | 5,351.51  |
| ICAM-1 (a)         | 43,559.51 | 34,089.94 | 43,228.16 | 46,172.97 | 46,892.37 | 46,414.39 |
| ICAM-1 (b)         | 42,049.43 | 34,022.7  | 42,674.04 | 45,490.04 | 47,115.96 | 47,282.04 |
| IFN-gamma (a)      | 4,627.25  | 4,165.48  | 4,502.49  | 5,598.59  | 4,836.27  | 5,136.01  |
| IFN-gamma (b)      | 4,730.95  | 4,048.01  | 4,551.1   | 5,623.71  | 4,893.78  | 5,567     |
| IGFBP-2 (a)        | 37,399.3  | 31,482.14 | 34,622.19 | 36,414.19 | 37,768.72 | 40,511.81 |
| IGFBP-2 (b)        | 37,499.76 | 32,535.3  | 33,633.84 | 36,483.86 | 37,968.82 | 38,718.19 |
| IGFBP-3 (a)        | 35,184.42 | 31,469.99 | 30,911.81 | 29,920.22 | 31,862.09 | 38,716.57 |
| IGFBP-3 (b)        | 34,237.38 | 31,311.2  | 30,785.43 | 30,343.91 | 32,413.78 | 39,155.66 |
| IL-1 alpha (a)     | 4,764.16  | 4,152.52  | 4,513.03  | 6,364.97  | 4,868.67  | 6,346.34  |
| IL-1 alpha (b)     | 4,628.06  | 4,023.71  | 4,467.66  | 6,127.61  | 4,598.9   | 6,053.89  |
| IL-1 beta (a)      | 4,323.46  | 3,676.16  | 3,916.77  | 4,762.54  | 4,828.97  | 4,760.92  |
| IL-1 beta (b)      | 4,369.63  | 3,816.32  | 4,036.67  | 4,402.04  | 4,634.54  | 4,336.42  |

Table S1 (Continued)

|                            |           |           |           |           |           |           |
|----------------------------|-----------|-----------|-----------|-----------|-----------|-----------|
| IL-10 (a)                  | 4,343.71  | 3,909.48  | 4,073.94  | 4,389.08  | 5,101.18  | 4,396.37  |
| IL-10 (b)                  | 4,235.96  | 3,786.34  | 3,970.24  | 4,251.35  | 4,815.2   | 4,805.48  |
| IL-11 (a)                  | 5,751.71  | 4,666.95  | 5,916.16  | 6,945.84  | 5,901.58  | 7,281.23  |
| IL-11 (b)                  | 5,652.87  | 4,923.76  | 5,936.42  | 6,459.76  | 6,138.14  | 7,252.87  |
| IL-12 p70 (a)              | 4,473.33  | 4,060.16  | 4,129.84  | 5,054.19  | 4,887.3   | 4,671     |
| IL-12 p70 (b)              | 4,534.9   | 4,231.91  | 4,187.35  | 4,864.62  | 5,398.49  | 4,789.28  |
| IL-13 (a)                  | 4,346.95  | 4,049.63  | 4,267.56  | 4,628.06  | 4,769.03  | 4,897.84  |
| IL-13 (b)                  | 4,101.48  | 3,834.95  | 3,949.18  | 4,441.73  | 4,237.58  | 4,675.86  |
| IL-15 (a)                  | 4,354.24  | 3,614.59  | 4,058.54  | 4,779.56  | 4,631.3   | 4,649.94  |
| IL-15 (b)                  | 4,327.51  | 4,022.09  | 3,994.54  | 4,165.48  | 4,329.13  | 4,331.56  |
| IL-16 (a)                  | 3,926.49  | 4,112.01  | 3,903     | 4,240.01  | 3,998.59  | 4,269.99  |
| IL-16 (b)                  | 3,854.39  | 3,736.92  | 4,071.51  | 3,832.52  | 3,790.39  | 4,427.96  |
| IL-17A (a)                 | 8,203.96  | 6,341.48  | 10,859.56 | 10,640.82 | 11,412.87 | 23,004.97 |
| IL-17A (b)                 | 9,284.67  | 7,615.81  | 11,457.43 | 11,877.08 | 10,068.06 | 25,284.67 |
| IL-18 Bpa (a)              | 13,595.35 | 10,921.13 | 15,762.44 | 13,524.06 | 14,612.06 | 19,831.71 |
| IL-18 Bpa (b)              | 14,433.03 | 10,981.89 | 16,776.72 | 13,121.43 | 16,122.14 | 20,157.38 |
| IL-19 (a)                  | 4,373.68  | 4,036.67  | 4,388.27  | 5,250.24  | 4,639.41  | 5,689.33  |
| IL-19 (b)                  | 4,413.38  | 4,129.84  | 4,287.81  | 5,062.29  | 4,589.99  | 5,710.39  |
| IL-1ra (a)                 | 4,214.09  | 4,204.37  | 4,892.16  | 4,325.89  | 4,434.44  | 4,159     |
| IL-1ra (b)                 | 3,961.33  | 3,846.29  | 5,038.8   | 4,127.41  | 4,516.27  | 4,441.73  |
| IL-2 (a)                   | 4,366.39  | 3,735.3   | 4,251.35  | 4,924.57  | 4,981.28  | 4,516.27  |
| IL-2 (b)                   | 4,633.73  | 4,133.89  | 4,110.39  | 5,141.68  | 5,083.35  | 4,303.2   |
| IL-22 (a)                  | 4,445.78  | 3,935.41  | 4,407.71  | 4,851.66  | 5,264.01  | 5,724.97  |
| IL-22 (b)                  | 4,603.76  | 4,005.89  | 4,335.61  | 4,799     | 5,001.53  | 5,396.87  |
| IL-23 (a)                  | 3,846.29  | 3,558.7   | 3,796.87  | 3,971.05  | 3,941.08  | 4,162.24  |
| IL-23 (b)                  | 4,069.89  | 3,806.59  | 3,885.18  | 3,886.8   | 3,973.48  | 4,344.52  |
| IL-24 (a)                  | 4,102.29  | 4,088.52  | 3,947.56  | 4,117.68  | 4,048.82  | 4,259.46  |
| IL-24 (b)                  | 4,041.53  | 3,965.38  | 3,919.2   | 4,386.65  | 4,013.18  | 4,218.95  |
| IL-27 (a)                  | 4,251.35  | 4,025.33  | 4,457.13  | 4,581.08  | 4,557.58  | 5,665.84  |
| IL-27 (b)                  | 4,255.41  | 4,412.57  | 4,573.78  | 4,509.78  | 4,658.85  | 5,732.27  |
| IL-3 (a)                   | 4,086.9   | 3,843.86  | 3,959.71  | 4,289.43  | 4,500.87  | 4,009.13  |
| IL-3 (b)                   | 3,940.27  | 3,741.78  | 3,863.3   | 4,096.62  | 4,577.03  | 4,127.41  |
| IL-31 (a)                  | 3,528.72  | 3,979.96  | 3,889.23  | 4,052.87  | 4,081.23  | 3,950.8   |
| IL-31 (b)                  | 3,932.16  | 3,999.41  | 4,106.34  | 4,044.77  | 4,089.33  | 4,005.89  |
| IL-32 alpha/beta/gamma (a) | 4,115.25  | 3,886.8   | 4,007.51  | 4,043.15  | 4,014.8   | 4,300.77  |
| IL-32 alpha/beta/gamma (b) | 4,059.35  | 3,859.25  | 3,970.24  | 4,235.15  | 4,052.06  | 4,145.23  |
| IL-33 (a)                  | 3,706.95  | 4,003.46  | 4,244.87  | 3,941.89  | 3,911.91  | 4,107.15  |
| IL-33 (b)                  | 3,757.18  | 3,985.63  | 4,131.46  | 3,962.95  | 3,880.32  | 4,042.34  |
| IL-34 (a)                  | 4,701.78  | 3,842.24  | 4,161.43  | 4,688.82  | 4,532.47  | 4,154.95  |
| IL-34 (b)                  | 4,230.29  | 3,659.96  | 4,168.72  | 4,468.47  | 3,971.05  | 4,130.65  |
| IL-4 (a)                   | 4,349.38  | 3,886.8   | 4,282.95  | 4,479.81  | 4,827.35  | 5,532.16  |
| IL-4 (b)                   | 4,699.35  | 4,118.49  | 4,379.35  | 4,692.87  | 4,556.77  | 4,837.89  |
| IL-5 (a)                   | 3,546.54  | 3,724.77  | 3,986.44  | 4,411.76  | 3,938.65  | 3,920.82  |
| IL-5 (b)                   | 3,728.82  | 3,836.57  | 4,068.27  | 4,496.01  | 3,728.82  | 4,085.28  |
| IL-6 (a)                   | 4,662.09  | 4,062.59  | 4,993.43  | 6,101.68  | 5,687.71  | 7,356.57  |
| IL-6 (b)                   | 4,914.04  | 4,336.42  | 4,918.09  | 6,555.35  | 5,499.76  | 7,184.01  |
| IL-8 (a)                   | 4,903.51  | 4,905.94  | 4,929.43  | 5,752.52  | 8,023.3   | 5,511.1   |

Table S1 (Continued)

|                            |           |           |           |           |           |           |
|----------------------------|-----------|-----------|-----------|-----------|-----------|-----------|
| IL-8 (b)                   | 4,858.95  | 5,515.15  | 5,102.8   | 6,408.72  | 9,343.81  | 5,345.03  |
| IP-10 (a)                  | 4,361.53  | 4,318.59  | 4,184.92  | 4,305.63  | 4,607.81  | 4,610.24  |
| IP-10 (b)                  | 4,343.71  | 4,265.94  | 4,283.76  | 4,282.95  | 4,440.92  | 4,892.97  |
| Kallikrein 3 (a)           | 4,473.33  | 4,349.38  | 4,574.59  | 5,565.38  | 4,556.77  | 7,008.22  |
| Kallikrein 3 (b)           | 4,972.37  | 4,354.24  | 4,743.1   | 6,244.27  | 4,866.24  | 7,281.23  |
| Leptin (a)                 | 4,009.94  | 6,708.47  | 26,090.75 | 4,730.14  | 40,552.32 | 36,914.04 |
| Leptin (b)                 | 4,167.91  | 6,688.22  | 27,488.22 | 4,575.41  | 41,138.04 | 37,633.43 |
| LIF (a)                    | 4,118.49  | 3,816.32  | 4,092.57  | 3,856.01  | 4,039.91  | 3,962.14  |
| LIF (b)                    | 3,633.23  | 3,843.86  | 4,031     | 3,995.35  | 3,875.46  | 4,271.61  |
| Lipocalin-2 (a)            | 43,935.41 | 41,867.96 | 39,126.49 | 41,435.35 | 41,511.51 | 44,251.35 |
| Lipocalin-2 (b)            | 42,157.18 | 40,065.43 | 39,346.85 | 41,650.85 | 41,312.22 | 43,188.47 |
| M-CSF (a)                  | 5,320.72  | 4,393.94  | 4,261.89  | 6,151.91  | 4,873.53  | 6,012.57  |
| M-CSF (b)                  | 5,098.75  | 4,561.63  | 4,749.58  | 6,142.19  | 4,753.63  | 6,559.41  |
| MCP-1 (a)                  | 5,313.43  | 5,227.56  | 5,993.13  | 9,079.71  | 6,985.53  | 14,634.75 |
| MCP-1 (b)                  | 4,936.72  | 5,204.06  | 5,654.49  | 8,602.54  | 6,074.14  | 11,991.3  |
| MCP-3 (a)                  | 3,806.59  | 3,890.04  | 3,933.78  | 4,022.09  | 3,935.41  | 4,043.15  |
| MCP-3 (b)                  | 3,792.01  | 3,919.2   | 3,957.28  | 4,224.62  | 3,920.01  | 4,031.81  |
| MIF (a)                    | 9,643.56  | 12,099.05 | 8,366.8   | 15,056.82 | 16,461.58 | 17,806.39 |
| MIF (b)                    | 9,532.57  | 12,142.8  | 8,414.59  | 14,255.61 | 17,626.54 | 17,547.96 |
| MIG (a)                    | 3,928.92  | 4,771.46  | 5,245.38  | 4,417.43  | 4,513.03  | 4,763.35  |
| MIG (b)                    | 4,235.15  | 4,636.16  | 5,233.23  | 4,153.33  | 4,291.05  | 4,708.27  |
| MIP-1 alpha/MIP-1 beta (a) | 3,694.8   | 4,078.8   | 3,980.77  | 3,967.81  | 3,962.14  | 4,036.67  |
| MIP-1 alpha/MIP-1 beta (b) | 3,646.19  | 3,876.27  | 3,900.57  | 3,821.18  | 3,834.14  | 3,997.78  |
| MIP-3 alpha (a)            | 3,893.28  | 3,971.86  | 3,994.54  | 4,037.48  | 3,870.59  | 4,249.73  |
| MIP-3 alpha (b)            | 3,866.54  | 3,984.82  | 3,834.95  | 3,826.85  | 3,540.87  | 4,304.82  |
| MIP-3 beta (a)             | 4,088.52  | 4,418.24  | 5,205.68  | 4,895.41  | 4,685.58  | 11,016.72 |
| MIP-3 beta (b)             | 4,434.44  | 4,816.82  | 5,439     | 5,373.38  | 5,195.15  | 12,375.3  |
| MMP-9 (a)                  | 23,242.34 | 34,550.9  | 15,947.96 | 29,369.33 | 37,898.34 | 40,125.38 |
| MMP-9 (b)                  | 25,308.16 | 34,780.16 | 16,929.84 | 31,836.97 | 38,814.59 | 39,637.68 |
| Myeloperoxidase (a)        | 3,970.24  | 4,069.89  | 4,524.37  | 4,204.37  | 4,671.81  | 19,131.76 |
| Myeloperoxidase (b)        | 4,359.91  | 4,394.75  | 5,002.34  | 4,585.94  | 5,274.54  | 19,384.52 |
| Negative control (a)       | 3,448.52  | 3,720.72  | 3,973.48  | 3,852.77  | 3,876.27  | 3,941.08  |
| Negative control (b)       | 3,488.22  | 3,738.54  | 3,813.89  | 3,635.66  | 3,503.61  | 3,740.97  |
| Osteopontin (OPN) (a)      | 35,660.77 | 35,127.71 | 35,876.27 | 35,597.58 | 39,423    | 41,934.39 |
| Osteopontin (OPN) (b)      | 36,302.39 | 35,356.16 | 34,507.15 | 35,870.59 | 40,054.09 | 41,600.62 |
| PDGF-AA (a)                | 7,590.7   | 10,172.57 | 5,582.39  | 17,538.24 | 12,287    | 8,497.23  |
| PDGF-AA (b)                | 7,337.13  | 9,839.61  | 5,358.8   | 16,857.73 | 12,153.33 | 8,374.09  |
| PDGF-AB/BB (a)             | 4,656.42  | 9,930.34  | 4,157.38  | 7,457.84  | 6,683.35  | 5,321.53  |
| PDGF-AB/BB (b)             | 4,247.3   | 9,611.96  | 4,457.13  | 8,148.87  | 6,633.13  | 5,191.1   |
| Pentraxin-3 (a)            | 6,212.67  | 4,910.8   | 6,694.7   | 7,769.73  | 6,323.66  | 11,477.68 |
| Pentraxin-3 (b)            | 6,906.14  | 5,627.76  | 7,960.11  | 8,374.9   | 6,168.92  | 12,158.19 |
| PF4/CXCL4 (a)              | 57,154.24 | 54,213.48 | 54,479.2  | 40,127    | 41,249.84 | 45,182.19 |
| PF4/CXCL4 (b)              | 52,260.27 | 54,831.61 | 53,351.51 | 38,979.86 | 41,018.95 | 45,058.24 |
| RAGE (a)                   | 6,634.75  | 4,277.28  | 4,565.68  | 4,534.09  | 5,084.16  | 5,582.39  |
| RAGE (b)                   | 7,128.11  | 4,494.39  | 4,644.27  | 4,949.68  | 5,119.81  | 5,895.1   |
| RANTES (a)                 | 39,853.99 | 41,006.8  | 23,384.11 | 45,642.34 | 41,897.13 | 35,163.35 |
| RANTES (b)                 | 40,141.58 | 38,945.84 | 24,694.9  | 45,287.51 | 42,260.87 | 36,268.37 |

Table S1 (Continued)

|                      |           |           |           |           |           |           |
|----------------------|-----------|-----------|-----------|-----------|-----------|-----------|
| RBP-4 (a)            | 59,311.61 | 59,420.97 | 57,823.41 | 61,807.61 | 61,830.29 | 61,105.23 |
| RBP-4 (b)            | 60,585.94 | 58,495.81 | 56,527.2  | 61,684.47 | 62,564.27 | 62,118.7  |
| Relaxin-2 (a)        | 3,940.27  | 4,339.66  | 4,516.27  | 4,402.85  | 5,694.19  | 5,046.09  |
| Relaxin-2 (b)        | 3,683.46  | 4,056.11  | 3,951.61  | 4,247.3   | 4,157.38  | 4,338.04  |
| Resistin (a)         | 22,460.57 | 23,546.14 | 13,109.28 | 18,477.18 | 12,946.44 | 16,427.56 |
| Resistin (b)         | 25,428.87 | 26,247.91 | 14,527    | 20,014.8  | 14,277.48 | 17,829.89 |
| Reference spot (a)   | 43,270.29 | 44,483.05 | 46,708.47 | 48,631.71 | 51,555.46 | 44,853.28 |
| Reference spot (b)   | 43,865.73 | 47,107.86 | 47,260.16 | 51,318.9  | 54,133.28 | 44,536.52 |
| Reference spot (c)   | 40,843.96 | 43,431.51 | 44,969.94 | 47,970.65 | 47,593.94 | 46,937.73 |
| Reference spot (d)   | 40,363.56 | 41,449.13 | 46,931.25 | 45,922.65 | 46,817.84 | 45,675.56 |
| Reference spot (e)   | 45,060.67 | 44,535.71 | 51,301.89 | 50,129.63 | 46,112.22 | 49,145.33 |
| Reference spot (f)   | 45,392.82 | 43,874.65 | 50,541.99 | 50,559.81 | 47,414.09 | 46,031.2  |
| SDF-1 alpha (a)      | 12,247.3  | 9,244.16  | 11,033.73 | 14,233.73 | 13,702.29 | 19,557.08 |
| SDF-1 alpha (b)      | 12,442.54 | 9,387.56  | 11,042.65 | 14,194.85 | 15,915.56 | 20,809.53 |
| Serpin E1 (a)        | 36,192.22 | 23,763.25 | 36,764.97 | 36,454.7  | 25,714.04 | 38,797.58 |
| Serpin E1 (b)        | 36,995.86 | 24,715.96 | 37,941.28 | 33,866.34 | 25,931.15 | 38,634.75 |
| SHBG (a)             | 35,062.9  | 32,288.22 | 34,419.66 | 38,209.43 | 40,391.91 | 40,647.91 |
| SHBG (b)             | 35,193.33 | 32,938.75 | 34,617.33 | 37,376.62 | 39,661.99 | 40,765.38 |
| ST2 (a)              | 34,708.06 | 15,909.08 | 22,115.46 | 21,848.92 | 21,605.89 | 38,766.8  |
| ST2 (b)              | 35,595.96 | 15,280.42 | 19,803.35 | 21,790.59 | 21,298.85 | 40,306.04 |
| TARC (a)             | 4,385.03  | 4,347.76  | 4,249.73  | 5,221.08  | 4,581.08  | 4,813.58  |
| TARC (b)             | 4,238.39  | 4,371.25  | 4,268.37  | 4,600.52  | 4,139.56  | 4,319.41  |
| TFF-3 (a)            | 37,903.2  | 32,803.46 | 36,916.47 | 33,532.57 | 33,399.71 | 42,076.16 |
| TFF-3 (b)            | 38,931.25 | 34,200.92 | 36,656.42 | 32,316.57 | 32,713.53 | 42,152.32 |
| TfR (a)              | 8,589.58  | 6,511.61  | 9,298.44  | 8,067.05  | 10,470.7  | 13,206.49 |
| TfR (b)              | 8,161.84  | 7,329.03  | 9,261.18  | 8,732.97  | 10,000.82 | 13,151.41 |
| TGF-alpha (a)        | 3,949.99  | 3,910.29  | 4,101.48  | 4,034.24  | 4,338.85  | 3,990.49  |
| TGF-alpha (b)        | 3,864.92  | 3,996.97  | 3,745.84  | 3,865.73  | 3,974.29  | 3,968.62  |
| Thrombospondin-1 (a) | 4,435.25  | 5,100.37  | 4,409.33  | 6,684.97  | 5,485.18  | 5,276.16  |
| Thrombospondin-1 (b) | 4,881.63  | 5,009.63  | 4,615.91  | 6,491.35  | 5,996.37  | 5,273.73  |
| TNF alpha (a)        | 5,760.62  | 5,607.51  | 4,503.3   | 6,394.14  | 5,771.15  | 4,923.76  |
| TNF alpha (b)        | 6,222.39  | 6,630.7   | 4,880.82  | 7,233.43  | 7,845.89  | 6,816.22  |
| uPAR (a)             | 19,002.95 | 8,170.75  | 10,615.71 | 11,935.41 | 11,684.27 | 26,396.97 |
| uPAR (b)             | 18,230.09 | 7,806.19  | 9,293.58  | 12,140.37 | 9,696.22  | 25,731.86 |
| VEGF (a)             | 4,252.97  | 4,357.48  | 4,556.77  | 4,261.89  | 4,148.47  | 5,153.03  |
| VEGF (b)             | 4,269.18  | 4,482.24  | 4,497.63  | 4,239.2   | 3,846.29  | 5,170.85  |
| Vitamin D BP (a)     | 50,776.92 | 48,411.35 | 51,728.82 | 51,765.28 | 33,650.85 | 53,288.32 |
| Vitamin D BP (b)     | 49,500.16 | 47,619.05 | 51,398.29 | 51,286.49 | 32,974.39 | 55,137.03 |

Note: BAFF: B cell activating factor; BDNF: brain-derived neurotrophic factor; BP: binding protein; EGF: epidermal growth factor; FGF: fibroblast growth factor; G-CSF: granulocyte-colony stimulating factor; GDF: growth differentiation factor; GM-CSF: granulocyte-macrophage colony-stimulating factor; GRO alpha: growth-regulated alpha protein; HGF: hepatocyte growth factor; ICAM-1: intercellular adhesion molecule 1; IFN: interferon; IGF1BP: insulin-like growth factor-binding protein; IL: interleukin; I-TAC: interferon-inducible T cell alpha chemoattractant; LIF: leukemia inhibitory factor; MCP: monocyte chemotactic protein; M-CSF: macrophage colony-stimulating factor; MIF: macrophage migration inhibitory factor; MIP: macrophage inflammatory protein; MMP: matrix metalloproteinase; PDGF: platelet-derived growth factor; RAGE: receptor for advanced glycation endproducts; RANTES: regulated on activation, normal T cell expressed and secreted; RBP: retinol-binding protein; SDF: stromal cell-derived factor; SHBG: sex hormone-binding globulin; TARC: thymus and activation regulated chemokine; TFF: trefoil factor; TfR: transferrin receptor; TGF: transforming growth factor; TNF: tumor necrosis factor; uPAR: urokinase-type plasminogen activator receptor; VEGF: vascular endothelial growth factor.
